# Supplementary material for: Ba18F18In8S21 and Ba9F10In4S10: new kind of mixed anion compounds with the novel low-dimensional structure
Source: Royal Society of Chemistry journal article supplement (doi:10.1039/c3ce41954a), 2014-01-01
Supplement: c3ce41954a.pdf [file c3ce41954a.pdf]

# Ba<sub>18</sub>F<sub>18</sub>In<sub>8</sub>S<sub>21</sub> and Ba<sub>9</sub>F<sub>10</sub>In<sub>4</sub>S<sub>10</sub>: New kind of Mixed Anions Compounds with the Novel Low-Dimensional Structure

Zhong-Zhen Luo,<sup>a,b</sup> Chen-Sheng Lin,<sup>a</sup> Wei-Long Zhang,<sup>a</sup> Hao Zhang,<sup>a</sup> Zhang-Zhen He<sup>a</sup> and Wen-Dan Cheng<sup>\*a</sup>

<sup>a</sup>State Key Laboratory of Structural Chemistry, Fujian Institute of Research on the Structure of Matter, Chinese Academy of Sciences, Fuzhou 350002, P. R. China

<sup>b</sup>University of Chinese Academy of Sciences, Beijing, 100039, P. R. China

\*E-mail: [cwd@fjirsm.ac.cn](mailto:cwd@fjirsm.ac.cn) (W.-D. Cheng)

## Electronic Supplementary Information

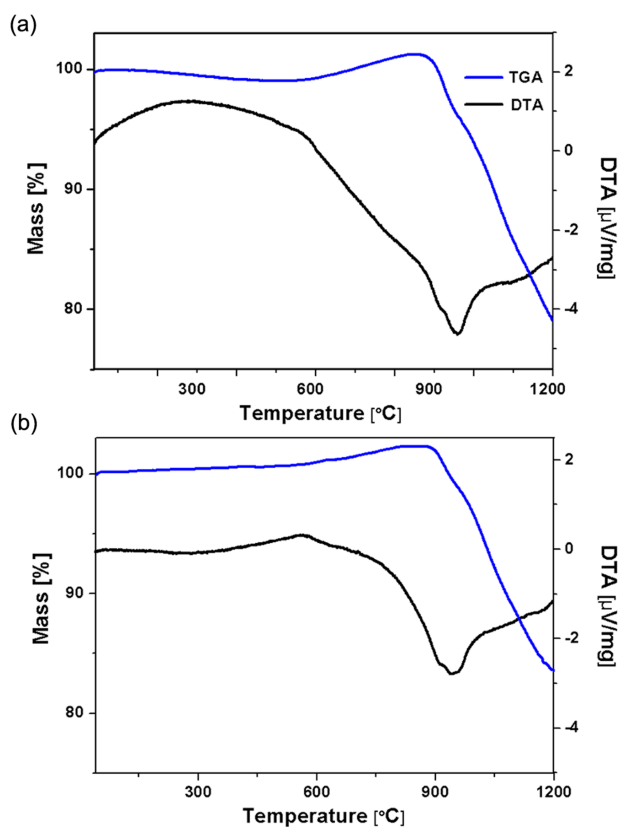

Fig. S1 TGA and DTA diagrams of 1 (a) and 2 (b).

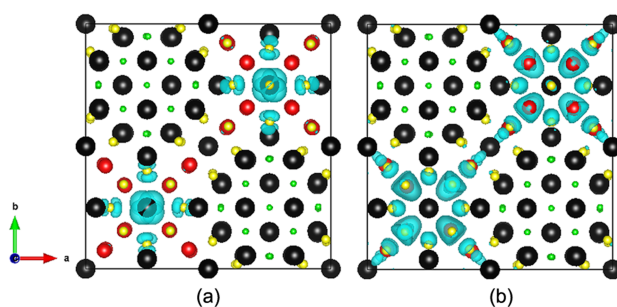

Fig. S2 The isosurfaces (iso-value = 0.00034 e/Å<sup>3</sup>) of charge distribution at the G point of HVB (a) and LCB (b) of 1. Black, Ba; red, In; yellow, S; green, F.

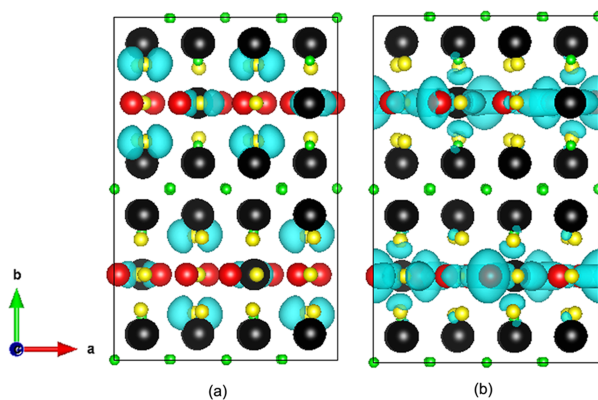

**Fig. S3** The isosurfaces (iso-value =  $0.00053 \text{ e}/\text{\AA}^3$ ) of charge distribution at the G point of HVB (a) and LCB (b) of **2**. Black, Ba; red, In; yellow, S; green, F.

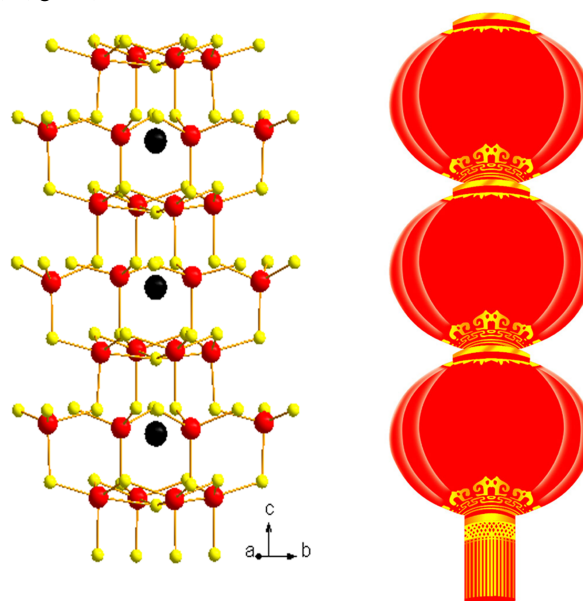

**Fig. S4** The 1D  $[\text{BaIn}_8\text{S}_{21}]$  covalent region looks like a string of red lanterns in **1**. Black, Ba; red, In; yellow, S.

**Table S1.** Atomic coordinates and equivalent isotropic displacement parameters ( $\text{\AA}^2$ ) of **1** and **2**.

| Atom                                                  | <i>x</i>  | <i>y</i>  | <i>z</i>   | $U_{\text{eq}}^a$ |
|-------------------------------------------------------|-----------|-----------|------------|-------------------|
| $\text{Ba}_{18}\text{F}_{18}\text{In}_8\text{S}_{21}$ |           |           |            |                   |
| Ba(1)                                                 | 0.1549(1) | 0.5548(1) | 0.1308(1)  | 0.010(1)          |
| Ba(2)                                                 | 0.3522(1) | 0.5539(1) | 0.1246(1)  | 0.009(1)          |
| Ba(3)                                                 | 0.6503(1) | 0.2502(1) | 0.3760(1)  | 0.009(1)          |
| Ba(4)                                                 | 0.2497(1) | 0.0406(1) | 0.3799(1)  | 0.010(1)          |
| Ba(5)                                                 | 0         | 0         | 0.5000     | 0.054(1)          |
| Ba(6)                                                 | 0.2500    | 0.2500    | 0.2952(1)  | 0.017(1)          |
| In(1)                                                 | 0.1604(1) | 0.1604(1) | 0.0737(1)  | 0.017(1)          |
| In(2)                                                 | 0.0744(1) | 0.0744(1) | -0.1677(1) | 0.012(1)          |
| In(3)                                                 | 0.0805(1) | 0.0805(1) | 0.3144(1)  | 0.012(1)          |

|                                    |            |           |            |          |
|------------------------------------|------------|-----------|------------|----------|
| In(4)                              | 0.3435(1)  | 0.1565(1) | 0.0795(1)  | 0.018(1) |
| S(1)                               | 0.0819(1)  | 0.0819(1) | 0.1217(3)  | 0.014(1) |
| S(2)                               | 0.0779(1)  | 0.0779(1) | -0.3684(3) | 0.015(1) |
| S(3)                               | 0.1542(1)  | 0.1542(1) | -0.1222(3) | 0.011(1) |
| S(4)                               | 0.1552(1)  | 0.1552(1) | 0.3824(3)  | 0.011(1) |
| S(5)                               | 0.2510(1)  | 0.1005(2) | 0.1361(2)  | 0.024(1) |
| S(6)                               | 0.2500     | 0.2500    | 0.0506(6)  | 0.035(2) |
| S(7)                               | -0.0183(1) | 0.1112(1) | 0.3801(2)  | 0.014(1) |
| S(8)                               | -0.0201(1) | 0.1202(1) | -0.1238(2) | 0.011(1) |
| F(1)                               | 0.2500     | 0.7500    | 0.2500     | 0.016(3) |
| F(2)                               | 0.6525(3)  | 0.1525(3) | 0.5000     | 0.014(2) |
| F(3)                               | 0.2544(2)  | 0.5511(3) | 0.2464(5)  | 0.013(1) |
| F(4)                               | 0.2507(2)  | 0.5521(3) | 0.0088(5)  | 0.014(1) |
| F(5)                               | 0.1521(3)  | 0.6521(3) | 0          | 0.014(2) |
| F(6)                               | 0.6528(3)  | 0.1534(3) | 0.2501(4)  | 0.014(1) |
| F(7)                               | 0.2500     | 0.7500    | 0          | 0.015(3) |
| <hr/> $Ba_9F_{10}In_4S_{10}$ <hr/> |            |           |            |          |
| Ba(1)                              | 0.3689(1)  | 0.5759(1) | 0.2563(1)  | 0.012(1) |
| Ba(2)                              | 0.1219(1)  | 0.5774(1) | 0.0037(1)  | 0.012(1) |
| Ba(3)                              | 0.1188(1)  | 0.4243(1) | 0.2501(1)  | 0.012(1) |
| Ba(4)                              | 0.6284(1)  | 0.5753(1) | -0.0057(1) | 0.012(1) |
| Ba(5)                              | -0.1269(1) | 0.7500    | -0.0008(1) | 0.035(1) |
| In(1)                              | 0.1757(1)  | 0.7500    | 0.1973(1)  | 0.019(1) |
| In(2)                              | 0.0801(1)  | 0.7500    | -0.2953(1) | 0.019(1) |
| In(3)                              | 0.2940(1)  | 0.7500    | -0.0834(1) | 0.048(1) |
| In(4)                              | 0.4811(1)  | 0.7500    | 0.1056(1)  | 0.054(1) |
| S(1)                               | 0.3622(3)  | 0.7500    | 0.2595(3)  | 0.017(1) |
| S(2)                               | 0.1072(2)  | 0.6419(2) | 0.2663(2)  | 0.023(1) |
| S(3)                               | 0.3798(2)  | 0.6476(2) | 0.0057(2)  | 0.025(1) |
| S(4)                               | 0.1389(2)  | 0.6376(2) | -0.2377(2) | 0.024(1) |
| S(5)                               | 0.1351(3)  | 0.7500    | -0.4875(3) | 0.017(1) |

|      |            |           |            |          |
|------|------------|-----------|------------|----------|
| S(6) | 0.1217(3)  | 0.7500    | 0.0075(3)  | 0.017(1) |
| S(7) | 0.3858(3)  | 0.7500    | -0.2544(3) | 0.019(1) |
| F(1) | -0.1242(4) | 0.6265(3) | -0.0014(4) | 0.017(2) |
| F(2) | 0.5030(4)  | 0.4983(3) | -0.1244(5) | 0.013(1) |
| F(3) | 0.4971(4)  | 0.5003(3) | 0.3763(5)  | 0.015(2) |
| F(4) | 0.7463(4)  | 0.4974(3) | 0.1203(5)  | 0.014(1) |
| F(5) | 0.2458(4)  | 0.5026(3) | 0.1297(5)  | 0.015(1) |

<sup>a</sup>  $U_{eq}$  is defined as one-third of the trace of the orthogonalized  $U_{ij}$  tensor.

**Table S2.** Selected bond-valence sums, bond lengths (Å) and angles (deg) of **1** and **2**.

|                                                                  | distance   | BV     |                   | distance   | BV     |
|------------------------------------------------------------------|------------|--------|-------------------|------------|--------|
| <b>Ba<sub>18</sub>F<sub>18</sub>In<sub>8</sub>S<sub>21</sub></b> |            |        |                   |            |        |
| Ba(1)-F(4)                                                       | 2.616(6)   | 0.3162 | Ba(6)-S(6)        | 3.086(7)   | 0.4256 |
| Ba(1)-F(6)#1                                                     | 2.634(6)   | 0.3012 | Ba(6)-S(4)#11     | 3.158(3)   | 0.3504 |
| Ba(1)-F(3)                                                       | 2.636(6)   | 0.2995 | Ba(6)-S(4)        | 3.158(3)   | 0.3504 |
| Ba(1)-F(5)                                                       | 2.709(4)   | 0.2459 | Ba(6)-S(3)#19     | 3.167(3)   | 0.3420 |
| Ba(1)-S(7)#2                                                     | 3.265(3)   | 0.2624 | Ba(6)-S(3)#3      | 3.167(3)   | 0.3420 |
| Ba(1)-S(8)#3                                                     | 3.280(2)   | 0.2519 | Ba(6)-S(6)#19     | 3.221(7)   | 0.2955 |
| Ba(1)-S(2)#3                                                     | 3.3869(11) | 0.1887 | ΣBVS=             |            | 2.1095 |
| Ba(1)-S(7)#4                                                     | 3.403(3)   | 0.1807 | In(1)-S(3)        | 2.479(4)   | 0.7249 |
|                                                                  | ΣBVS=      | 2.0465 | In(1)-S(5)        | 2.523(3)   | 0.6436 |
| Ba(3)-F(6)                                                       | 2.663(6)   | 0.2785 | In(1)-S(5)#1      | 2.523(3)   | 0.6436 |
| Ba(3)-F(5)#3                                                     | 2.665(5)   | 0.2770 | In(1)-S(1)        | 2.527(4)   | 0.6367 |
| Ba(3)-F(2)                                                       | 2.665(4)   | 0.2770 | In(1)-S(6)        | 2.8105(13) | 0.2959 |
| Ba(3)-F(6)#14                                                    | 2.669(6)   | 0.2740 | ΣBVS=             |            | 2.9447 |
| Ba(3)-F(7)#15                                                    | 2.699(6)   | 0.2740 | In(2)-S(8)#1      | 2.383(2)   | 0.9397 |
| Ba(3)-F(1)#16                                                    | 2.7135(6)  | 0.2429 | In(2)-S(8)        | 2.383(2)   | 0.9397 |
| Ba(3)-F(3)#1                                                     | 2.735(6)   | 0.2292 | In(2)-S(2)        | 2.534(4)   | 0.6248 |
| Ba(3)-F(4)#3                                                     | 2.740(6)   | 0.2261 | In(2)-S(3)        | 2.554(4)   | 0.6248 |
|                                                                  | ΣBVS=      | 2.0787 | ΣBVS=             |            | 3.129  |
| Ba(4)-F(4)#18                                                    | 2.613(6)   | 0.3188 | F(4)-Ba(1)-F(6)#1 | 111.4(2)   |        |
| Ba(4)-F(3)#11                                                    | 2.633(6)   | 0.3020 | F(4)-Ba(1)-F(3)   | 69.63(19)  |        |

|               |               |        |                     |            |
|---------------|---------------|--------|---------------------|------------|
| Ba(4)-S(8)#19 | 3.169(2)      | 0.3401 | F(5)-Ba(1)-S(7)#2   | 69.54(11)  |
| Ba(4)-S(4)    | 3.279(3)      | 0.2527 | S(7)#2-Ba(1)-S(8)#3 | 85.02(6)   |
| Ba(4)-S(3)#19 | 3.284(3)      | 0.2493 | F(3)-Ba(1)-S(2)#3   | 112.90(15) |
| Ba(4)-S(7)#1  | 3.321(3)      | 0.2255 | S(3)-In(1)-S(1)     | 99.34(12)  |
| Ba(4)-S(5)    | 3.348(3)      | 0.2097 | S(8)#1-In(2)-S(2)   | 104.25(7)  |
| Ba(4)-S(5)#20 | 3.492(3)      | 0.1421 | S(2)-In(2)-S(3)     | 100.49(12) |
|               | $\Sigma$ BVS= | 2.0402 | S(7)-In(3)-S(4)     | 107.01(8)  |

$\text{Ba}_9\text{F}_{10}\text{In}_4\text{S}_{10}$

|              |               |        |                     |               |        |
|--------------|---------------|--------|---------------------|---------------|--------|
| Ba(1)-F(5)   | 2.631(6)      | 0.3036 | In(1)-S(2)#9        | 2.417(3)      | 0.8572 |
| Ba(1)-F(3)   | 2.647(6)      | 0.2908 | In(1)-S(2)          | 2.417(3)      | 0.8572 |
| Ba(1)-F(4)#1 | 2.660(6)      | 0.2807 | In(1)-S(1)          | 2.471(4)      | 0.7408 |
| Ba(1)-F(2)#2 | 2.718(6)      | 0.2400 | In(1)-S(6)          | 2.483(4)      | 0.7172 |
| Ba(1)-F(1)#3 | 3.237(6)      | 0.0590 |                     | $\Sigma$ BVS= | 3.1724 |
| Ba(1)-S(2)#3 | 3.267(3)      | 0.2610 | In(3)-S(7)          | 2.442(4)      | 0.8254 |
| Ba(1)-S(1)   | 3.3591(7)     | 0.2034 | In(3)-S(6)          | 2.449(4)      | 0.8143 |
| Ba(1)-S(3)   | 3.446(3)      | 0.1609 | In(3)-S(3)#9        | 2.514(3)      | 0.6776 |
| Ba(1)-S(2)   | 3.529(3)      | 0.1285 | In(3)-S(3)          | 2.514(3)      | 0.6776 |
|              | $\Sigma$ BVS= | 1.9279 |                     | $\Sigma$ BVS= | 2.994  |
| Ba(4)-F(2)   | 2.631(6)      | 0.3036 | F(5)-Ba(1)-F(3)     | 114.05(17)    |        |
| Ba(4)-F(4)   | 2.640(6)      | 0.2963 | F(3)-Ba(1)-F(4)#1   | 72.89(16)     |        |
| Ba(4)-F(5)#2 | 2.682(6)      | 0.2645 | S(3)-Ba(1)-S(2)     | 85.71(7)      |        |
| Ba(4)-F(2)#2 | 2.724(6)      | 0.2362 | S(4)-Ba(2)-S(3)     | 79.01(8)      |        |
| Ba(4)-F(1)#7 | 3.262(6)      | 0.0552 | F(4)#1-Ba(3)-S(4)#6 | 66.91(13)     |        |
| Ba(4)-S(2)#3 | 3.285(3)      | 0.2486 | S(2)-In(1)-S(6)     | 104.36(9)     |        |
| Ba(4)-S(5)#8 | 3.3701(7)     | 0.1976 | S(4)#9-In(2)-S(5)   | 101.85(8)     |        |
| Ba(4)-S(3)   | 3.424(3)      | 0.1707 | S(6)-In(3)-S(3)     | 99.85(9)      |        |
| Ba(4)-S(4)#8 | 3.448(3)      | 0.1600 | S(5)#8-In(4)-S(1)   | 165.14(16)    |        |
|              | $\Sigma$ BVS= | 1.9327 | S(1)-In(4)-S(3)     | 94.69(9)      |        |

Symmetry transformations used to generate equivalent atoms:

For  $\text{Ba}_{18}\text{F}_{18}\text{In}_8\text{S}_{21}$ : #1 y,x,z #2 -x,y+1/2,-z+1/2 #3 y,-x+1/2,z+1/2 #4 y,-x+1/2,z-1/2 #11 -x+1/2,-y+1/2,z  
 #14 y+1/2,-x+1,-z+1/2 #15 -y+3/2,x,z+1/2 #16 x+1/2,-y+1,-z+1/2 #18 x,-y+1/2,z+1/2  
 #19 -y+1/2,x,z+1/2 #20 -x+1/2,y,z+1/2

For  $\text{Ba}_9\text{F}_{10}\text{In}_4\text{S}_{10}$ : #1  $x-1/2, y, -z+1/2$  #2  $-x+1, -y+1, -z$  #3  $x+1/2, y, -z+1/2$  #6  $-x+1/2, -y+1, z+1/2$  #7  $x+1, y, z$   
#8  $x+1/2, y, -z-1/2$  #9  $x, -y+3/2, z$
